# Supplementary material for: Mechanistic insight from activation parameters for the reaction between co-enzyme B12 and cyanide: further evidence that heterolytic Co–C bond cleavage is solvent-assistedElectronic supplementary information (ESI) available: NMR and kinetic data. See http://www.rsc.org/suppdata/dt/b2/b210068a/
Source: Royal Society of Chemistry journal article supplement (doi:10.1039/b210068a), 2003-01-20
Supplement: b210068a.doc [file b210068a.doc]

**Supporting Information**

Figure A

Plot of observed rate constant (kobs) versus CN- concentration for the reaction between AdoCbl and CN- at 25.0 C ([AdoCbl] ~5 x 10-5 M, [NaCN] = 0.150 – 3.00 M, D2O, 0.100 M CAPS, pD 11.0, I = 5.0 M (NaClO4)). The best fit of the data to eq. (1) gave k2 = (1.93 ± 0.04) x 10-2 s-1 and KCN/KCo = 0.25 ± 0.01 M-1.

Figure B

Plot of 1H NMR chemical shift versus [CN-] for the B4 nucleotide signal of {AdoCbl + (-Ado)(-CN)Cbl-} (D2O, 0.100 M CAPS, pD 11.0, 25.0 C, I = 5.0 M (NaClO4)). The data has been fitted to eq(3) in the text fixing KCN/KCo’ = 0.25 M-1, giving AdoCbl = 6.27  0.01 ppm and AdoCNCbl =7.19  0.03 ppm.

Figure C

Plot of ln(kobs/temperature) versus 1/temperature for the reaction between ~8 x 10-5 M AdoCbl and 4.00 M NaCN, pH = 11.0, I = 4.0 M (NaClO4). From the slope and intercept of the plot, H andS are 55  1 kJ mol-1 and -98  3 J mol-1 K-1, respectively.

Figure D

Plot of ln(kobs) versus pressure for the reaction between AdoCbiOH and 0.500 M NaCN in H2O at pH 11.0 and 35.0 C (I = 1.0 M (NaClO4)). From the slope of the plot, V = -4.5  0.4 cm3 mol-1.

Figure E

Plot of ln(kobs) versus pressure for the reaction between ~ 8 x 10-5 M AdoCbl and 0.100 M tetrabutylammonium cyanide in 92% DMF/ 8% D2O at 35.0 C (I = 0.5 M (tetrabutylammonium perchlorate)). From the slope of the plot, V = -8.2  0.3 cm3 mol-1.

Figure F

Plot of ln(kobs) versus pressure for the reaction between ~ 6 x 10-5M AdoCbiOH and 0.0400 M tetrabutylammonium cyanide in 92 % DMF/ 8% D2O at 35.0 C (I = 0.5 M (tetrabutylammonium perchlorate)). From the slope of the plot, V = -8.8  0.7 cm3 mol-1.

Figure G

Plot of ln(kobs/temperature) versus 1/temperature for the reaction between ~6 x 10-5 M AdoCbiOH and 0.040 M tetrabutylammonium cyanide in 92 % DMF/ 8% D2O, I = 0.5 M (tetrabutylammonium perchlorate). From the slope and intercept of the plot, H andS are 85  3 kJ mol-1 and -39  10 J mol-1 K-1, respectively.
